# Supplementary material for: Virtual Simulation as a Catalyst for Equitable and Authentic Interprofessional Learning
Source: Research Square preprint supplement (doi:10.21203/rs.3.rs-8583962/v1), 2026-02-18
Supplement: Supplementary file 1 [file f83135d7605f0d1467910fd1.docx]

**INTERVIEW GUIDE**

**Virtual Simulation as a Catalyst for Equitable and Authentic Interprofessional Learning**

The central question for this study was: **“What are your views regarding the use of technology in interprofessional simulation within your curriculum?”**

This question was followed by additional probing questions based on participants’ responses, using communication competencies such as probing, seeking clarity, paraphrasing, and the strategic use of silence, among others.
